# Supplementary material for: Synergy between the anthocyanin and RDR6/SGS3/DCL4 siRNA pathways expose hidden features of Arabidopsis carbon metabolism
Source: PubMed Central journal article supplement (PMC7229025; doi:10.1038/s41467-020-16289-3), 2020-05-15
Supplement: 41467_2020_16289_MOESM4_ESM.pdf [file 41467_2020_16289_MOESM4_ESM.pdf]

## Description of Additional Supplementary Files

File name: Supplementary Data 1

Description: Summary of total aligned features between *tt19* suppressor lines or Col-0 and *tt19-8* by pairwise analyses using XCMS online.

File name: Supplementary Data 2

Description: List of 2,642 genes that were differential expressed between *tt19-8* and Col-0 under AIC.

File name: Supplementary Data 3

Description: Expression and Mfuzz clustering of 92 flavonoid-related genes in *tt19-8* and *tt19* suppressors against Col-0 under AIC.

File name: Supplementary Data 4

Description: Expression and Mfuzz clustering of 244 shared genes in all *tt19* suppressors against *tt19-8* under AIC.

File name: Supplementary Data 5

Description: Small RNA-seq differential expression analysis for miRs, tasiRNAs, and siRs among Col-0, *tt19-8*, *tt19-8 S2*, and *tt19-8 S7* under AIC.

File name: Supplementary Data 6

Description: Prediction of siR6611 target sites by psRNAtarget analysis.
